# Supplementary material
Source: Springer Nature journal article supplement (https://www.springermedizin.de/resource/supplementary/12877_2010_587_MOESM1_ESM.pdf/9439920)

# BEHAVIOURAL CHANGE IDENTIFICATION !

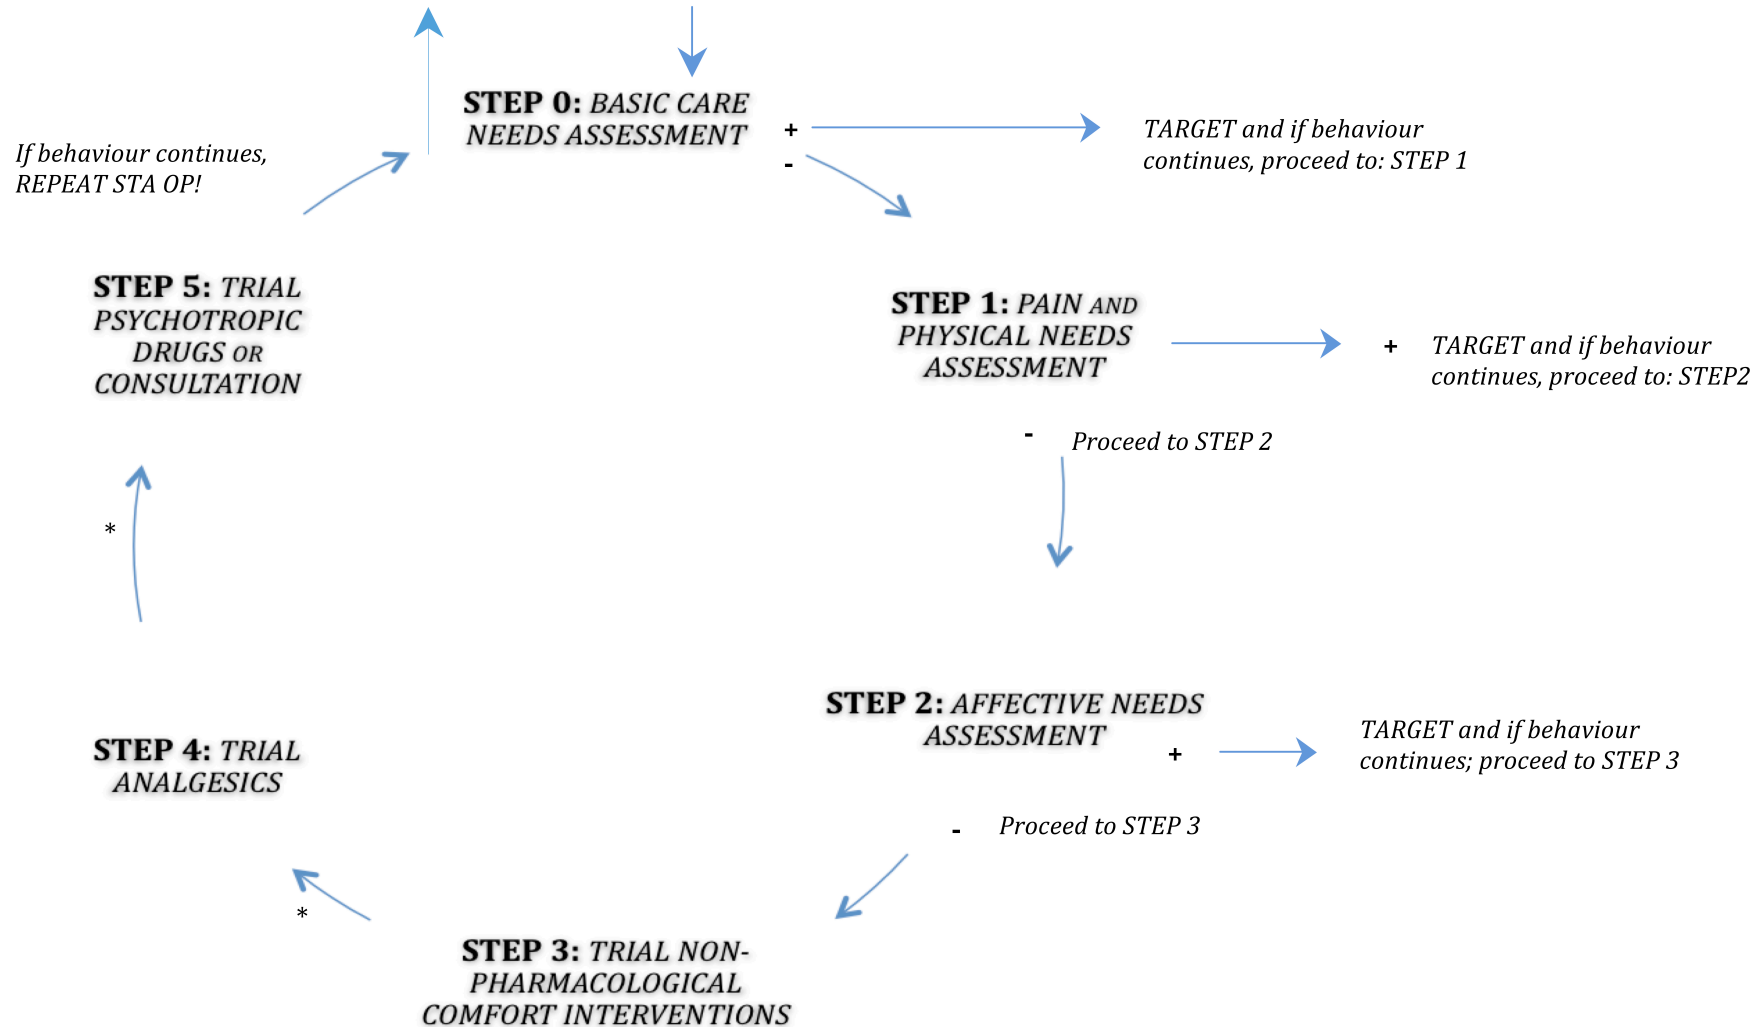

\* If behaviour continues, proceed to the next step.

Supplement: MOESM1 [file 9439920]
